# Supplementary material for: Transcriptome analysis reveals the oxidative stress response in Saccharomyces cerevisiae
Source: Royal Society of Chemistry journal article supplement (doi:10.1039/c4ra14600j), 2015-01-01
Supplement: c4ra14600j2.xlsx [file c4ra14600j2.xlsx]

## Sheet: Sheet1
Table S1 The differential expressed genes encoding transcription factors in the mutant strain against oxidation stress
Gene_id	Readcount HP_M	Readcount nHP_M	log2FoldChange	padj	Description
YCR065W	295.131	471.92	-0.67719	0.031209	sp|P25364|HCM1_YEAST Forkhead transcription factor HCM1 OS=Saccharomyces cerevisiae (strain ATCC 204508 / S288c) GN=HCM1 PE=1 SV=3//0
YAL001C	1412.12	1064.14	0.40818	0.0028033	sp|P34111|TFC3_YEAST Transcription factor tau 138 kDa subunit OS=Saccharomyces cerevisiae (strain ATCC 204508 / S288c) GN=TFC3 PE=1 SV=1//0
YBL066C	776.689	517.487	0.58582	8.25e-05	sp|P34228|SEF1_YEAST Putative transcription factor SEF1 OS=Saccharomyces cerevisiae (strain ATCC 204508 / S288c) GN=SEF1 PE=1 SV=4//0
YBR182C	256.347	131.964	0.95796	4.02e-06	sp|P38128|SMP1_YEAST Transcription factor SMP1 OS=Saccharomyces cerevisiae (strain ATCC 204508 / S288c) GN=SMP1 PE=1 SV=1//0
YDR223W	678.172	250.883	1.4346	3.98e-20	sp|Q04930|CRF1_YEAST Transcription factor CRF1 OS=Saccharomyces cerevisiae (strain ATCC 204508 / S288c) GN=CRF1 PE=1 SV=1//0
YDR362C	823.823	589.806	0.48209	0.0011327	sp|Q06339|TFC6_YEAST Transcription factor tau 91 kDa subunit OS=Saccharomyces cerevisiae (strain ATCC 204508 / S288c) GN=TFC6 PE=1 SV=1//0
YDR460W	798.194	634.211	0.33178	0.029412	sp|Q03290|TFB3_YEAST RNA polymerase II transcription factor B subunit 3 OS=Saccharomyces cerevisiae (strain ATCC 204508 / S288c) GN=TFB3 PE=1 SV=1//0
YDR463W	1795.38	1391.59	0.36756	0.0056919	sp|Q00947|STP1_YEAST Transcription factor STP1 OS=Saccharomyces cerevisiae (strain ATCC 204508 / S288c) GN=STP1 PE=1 SV=3//0
YER064C	1301.44	878.193	0.5675	0.00020029	sp|P40041|VHR2_YEAST Transcription factor VHR2 OS=Saccharomyces cerevisiae (strain ATCC 204508 / S288c) GN=VHR2 PE=1 SV=1//0
YHL027W	2565.13	1943.04	0.40072	0.0015749	sp|P33400|PACC_YEAST pH-response transcription factor pacC/RIM101 OS=Saccharomyces cerevisiae (strain ATCC 204508 / S288c) GN=RIM101 PE=1 SV=2//0
YHR006W	1590.97	1104.2	0.5269	5.94e-05	sp|P38704|STP2_YEAST Transcription factor STP2 OS=Saccharomyces cerevisiae (strain ATCC 204508 / S288c) GN=STP2 PE=1 SV=1//0
YIR018W	420.359	210.43	0.99828	9.41e-09	sp|P40574|YAP5_YEAST AP-1-like transcription factor YAP5 OS=Saccharomyces cerevisiae (strain ATCC 204508 / S288c) GN=YAP5 PE=1 SV=1//1.04392e-159
YKL043W	1589.82	1037.26	0.61608	2.1e-06	sp|P36093|PHD1_YEAST Putative transcription factor PHD1 OS=Saccharomyces cerevisiae (strain ATCC 204508 / S288c) GN=PHD1 PE=1 SV=1//0
YLR055C	1214.72	974.891	0.31731	0.023725	sp|P38915|SPT8_YEAST Transcription factor SPT8 OS=Saccharomyces cerevisiae (strain ATCC 204508 / S288c) GN=SPT8 PE=1 SV=1//0
YLR256W	4865.48	3879.29	0.32679	0.0090572	sp|P0CE41|HAP1_YEAST Heme-responsive zinc finger transcription factor HAP1 OS=Saccharomyces cerevisiae (strain ATCC 204508 / S288c) GN=HAP1 PE=1 SV=1//0
YLR266C	645.317	435.128	0.56857	0.00026254	sp|Q06149|PDR8_YEAST Transcription factor PDR8 OS=Saccharomyces cerevisiae (strain ATCC 204508 / S288c) GN=PDR8 PE=1 SV=1//0
YMR043W	1589.06	1977.4	-0.31544	0.016928	sp|P11746|MCM1_YEAST Pheromone receptor transcription factor OS=Saccharomyces cerevisiae (strain ATCC 204508 / S288c) GN=MCM1 PE=1 SV=2//1.31743e-08
YNR009W	139.572	200.469	-0.52237	0.033856	sp|P53718|NRM1_YEAST Transcription factor NRM1 OS=Saccharomyces cerevisiae (strain ATCC 204508 / S288c) GN=NRM1 PE=1 SV=1//0
YOR032C	427.833	249.7	0.77686	6.82e-06	sp|Q12398|HMS1_YEAST Probable transcription factor HMS1 OS=Saccharomyces cerevisiae (strain ATCC 204508 / S288c) GN=HMS1 PE=1 SV=1//0
YOR162C	804.488	445.614	0.85228	5.57e-09	sp|Q12172|YRR1_YEAST Zinc finger transcription factor YRR1 OS=Saccharomyces cerevisiae (strain ATCC 204508 / S288c) GN=YRR1 PE=1 SV=1//0
YOR172W	928.988	713.433	0.38088	0.0092936	sp|Q12340|YRM1_YEAST Zinc finger transcription factor YRM1 OS=Saccharomyces cerevisiae (strain ATCC 204508 / S288c) GN=YRM1 PE=1 SV=1//0
YPL089C	1476.42	1161.05	0.34667	0.012157	sp|Q12224|RLM1_YEAST Transcription factor RLM1 OS=Saccharomyces cerevisiae (strain ATCC 204508 / S288c) GN=RLM1 PE=1 SV=1//0
YPR030W	5835.89	2733.25	1.0943	3.98e-20	sp|Q12734|CSR2_YEAST Transcription factor CSR2 OS=Saccharomyces cerevisiae (strain ATCC 204508 / S288c) GN=CSR2 PE=1 SV=1//0
YPR199C	759.84	570.884	0.4125	0.0066098	sp|Q06596|YAP8_YEAST AP-1-like transcription factor YAP8 OS=Saccharomyces cerevisiae (strain ATCC 204508 / S288c) GN=ARR1 PE=2 SV=1//0
YDR167W	148945	112481	0.4051	0.00045356	sp|Q12030|TAF10_YEAST Transcription initiation factor TFIID subunit 10 OS=Saccharomyces cerevisiae (strain ATCC 204508 / S288c) GN=TAF10 PE=1 SV=1//2.87653e-88
YKR077W	155.202	311.005	-1.0028	1.75e-07	sp|P36157|MSA2_YEAST Putative transcriptional activator MSA2 OS=Saccharomyces cerevisiae (strain ATCC 204508 / S288c) GN=MSA2 PE=1 SV=1//0
YBR216C	600.449	473.738	0.34195	0.037249	sp|P38315|YBP1_YEAST YAP1-binding protein 1 OS=Saccharomyces cerevisiae (strain ATCC 204508 / S288c) GN=YBP1 PE=1 SV=1//0
YGR116W	2703.23	3303.17	-0.28917	0.023255	sp|P23615|SPT6_YEAST Transcription elongation factor SPT6 OS=Saccharomyces cerevisiae (strain ATCC 204508 / S288c) GN=SPT6 PE=1 SV=1//0
YDR423C	1376.79	837.898	0.71646	6.21e-08	sp|P24813|YAP2_YEAST AP-1-like transcription activator YAP2 OS=Saccharomyces cerevisiae (strain ATCC 204508 / S288c) GN=CAD1 PE=1 SV=2//0
YJL056C	957.948	604.411	0.66442	2.49e-06	sp|P47043|ZAP1_YEAST Zinc-responsive transcriptional regulator ZAP1 OS=Saccharomyces cerevisiae (strain ATCC 204508 / S288c) GN=ZAP1 PE=1 SV=1//0
