# Supplementary material for: Transcriptome analysis reveals the oxidative stress response in Saccharomyces cerevisiae
Source: Royal Society of Chemistry journal article supplement (doi:10.1039/c4ra14600j), 2015-01-01
Supplement: c4ra14600j3.xlsx [file c4ra14600j3.xlsx]

## Sheet: Sheet1
Table S2 The differential expressed genes encoding transcription factors between the mutant strain and control upon oxidation stress
Gene_id	Readcount HP_M	Readcount HP_C	log2FoldChange	padj	Description
YAL001C	1593.85	1213.21	0.39369	0.025535	sp|P34111|TFC3_YEAST Transcription factor tau 138 kDa subunit OS=Saccharomyces cerevisiae (strain ATCC 204508 / S288c) GN=TFC3 PE=1 SV=1//0
YCR065W	333.101	608.659	-0.86967	0.022717	sp|P25364|HCM1_YEAST Forkhead transcription factor HCM1 OS=Saccharomyces cerevisiae (strain ATCC 204508 / S288c) GN=HCM1 PE=1 SV=3//0
YDR223W	765.44	389.013	0.97647	1.55e-08	sp|Q04930|CRF1_YEAST Transcription factor CRF1 OS=Saccharomyces cerevisiae (strain ATCC 204508 / S288c) GN=CRF1 PE=1 SV=1//0
YDR423C	1553.96	962.196	0.69154	0.0089479	sp|P24813|YAP2_YEAST AP-1-like transcription activator YAP2 OS=Saccharomyces cerevisiae (strain ATCC 204508 / S288c) GN=CAD1 PE=1 SV=2//0
YDR362C	929.842	662.814	0.48838	0.0097379	sp|Q06339|TFC6_YEAST Transcription factor tau 91 kDa subunit OS=Saccharomyces cerevisiae (strain ATCC 204508 / S288c) GN=TFC6 PE=1 SV=1//0
YER064C	1468.93	733.495	1.0019	6.16e-11	sp|P40041|VHR2_YEAST Transcription factor VHR2 OS=Saccharomyces cerevisiae (strain ATCC 204508 / S288c) GN=VHR2 PE=1 SV=1//0
YHR006W	1795.7	1292.24	0.47467	0.0042709	sp|P38704|STP2_YEAST Transcription factor STP2 OS=Saccharomyces cerevisiae (strain ATCC 204508 / S288c) GN=STP2 PE=1 SV=1//0
YIR018W	474.449	336.766	0.49451	0.022574	sp|P40574|YAP5_YEAST AP-1-like transcription factor YAP5 OS=Saccharomyces cerevisiae (strain ATCC 204508 / S288c) GN=YAP5 PE=1 SV=1//1.04392e-159
YKL005C	1959.89	1477.81	0.40732	0.016206	sp|P36106|BYE1_YEAST Transcription factor BYE1 OS=Saccharomyces cerevisiae (strain ATCC 204508 / S288c) GN=BYE1 PE=1 SV=1//0
YJL056C	1081.22	702.442	0.62221	0.00036842	sp|P47043|ZAP1_YEAST Zinc-responsive transcriptional regulator ZAP1 OS=Saccharomyces cerevisiae (strain ATCC 204508 / S288c) GN=ZAP1 PE=1 SV=1//0
YKL043W	1794.39	2576.67	-0.52201	0.001757	sp|P36093|PHD1_YEAST Putative transcription factor PHD1 OS=Saccharomyces cerevisiae (strain ATCC 204508 / S288c) GN=PHD1 PE=1 SV=1//0
YLR055C	1371.03	1011.84	0.43828	0.01178	sp|P38915|SPT8_YEAST Transcription factor SPT8 OS=Saccharomyces cerevisiae (strain ATCC 204508 / S288c) GN=SPT8 PE=1 SV=1//0
YLR403W	1503.8	1096.98	0.45508	0.0091692	sp|P32432|SFP1_YEAST Transcription factor SFP1 OS=Saccharomyces cerevisiae (strain ATCC 204508 / S288c) GN=SFP1 PE=1 SV=1//0
YOR032C	482.89	311.686	0.6316	0.0021231	sp|Q12398|HMS1_YEAST Probable transcription factor HMS1 OS=Saccharomyces cerevisiae (strain ATCC 204508 / S288c) GN=HMS1 PE=1 SV=1//0
YOR162C	908.015	534.943	0.76333	1.87e-05	sp|Q12172|YRR1_YEAST Zinc finger transcription factor YRR1 OS=Saccharomyces cerevisiae (strain ATCC 204508 / S288c) GN=YRR1 PE=1 SV=1//0
YPR030W	6586.92	2676.65	1.2992	1.19e-07	sp|Q12734|CSR2_YEAST Transcription factor CSR2 OS=Saccharomyces cerevisiae (strain ATCC 204508 / S288c) GN=CSR2 PE=1 SV=1//0
YPR199C	857.625	633.818	0.43628	0.027855	sp|Q06596|YAP8_YEAST AP-1-like transcription factor YAP8 OS=Saccharomyces cerevisiae (strain ATCC 204508 / S288c) GN=ARR1 PE=2 SV=1//0
