# Supplementary material for: Transcriptome analysis reveals the oxidative stress response in Saccharomyces cerevisiae
Source: Royal Society of Chemistry journal article supplement (doi:10.1039/c4ra14600j), 2015-01-01
Supplement: c4ra14600j4.xlsx [file c4ra14600j4.xlsx]

## Sheet: Sheet1
Table S3 The most enriched pathway terms in the mutant strain upon the oxidation stress
KEGG Term	aSample number	bBackground number	cCorrected P-value	Gene_id
Proteasome	32	35	1.70405e-05	YPR108W YDL147W YHR027C YFL007W YFR050C YGL048C YGR135W YER012W YJL001W YOR259C YHR200W YOR117W YDR363W-A YKL145W YER094C YMR314W YFR052W YDR394W YIL075C YOR157C YPR103W YER021W YDL007W YFR004W YGL011C YDL097C YOL038W YGR253C YML092C YDR427W YOR362C YBR173C
Pyrimidine metabolism	53	71	0.000532735	YHR106W YIL020C-A YIL021W YPR187W YJR043C YOR074C YJL130C YOR210W YOR340C YJR109C YEL021W YLR420W YDR353W YJL026W YDR045C YNR003C YNL262W YOR303W YPR175W YKL216W YDL102W YMR271C YGL070C YPR110C YNL113W YHR128W YOL005C YPR062W YHR143W-A YOR151C YBR278W YNL151C YER005W YOR207C YDL150W YPR190C YJR103W YJL148W YBR252W YJR063W YKL024C YOR341W YNL248C YBR154C YDL140C YNR012W YBL039C YPR010C YOR116C YER…
Purine metabolism	67	94	0.000532735	YMR278W YGL248W YIL020C-A YIL021W YPR187W YHR143W-A YJR043C YHL011C YCL050C YOR210W YOR340C YLR359W YJR105W YMR217W YDR530C YJR010W YOL061W YJL026W YPR010C YKL127W YDR045C YIR029W YNL262W YPR175W YHR216W YKL001C YDL102W YOR207C YLR432W YPR110C YIR032C YAL038W YJR063W YOL005C YMR120C YML056C YOR151C YBR278W YNL151C YER005W YGL234W YOR347C YDL150W YPR190C YNL113W YML022W YGR061C YJL148W YBL068W YNL…
RNA polymerase	26	30	0.000646782	YIL020C-A YIL021W YPR187W YOR210W YOR340C YDR045C YNR003C YPR110C YNL113W YJR063W YOL005C YBR154C YHR143W-A YOR151C YOR341W YOR116C YOR207C YPR190C YJL148W YNL248C YDL150W YDL140C YGL070C YNL151C YOR224C YKL144C YPR010C
Ribosome biogenesis in eukaryotes	61	91	0.011965	YLR293C YGR090W YPL217C YHR072W-A YBR257W YMR093W YBR167C YER006W YNL207W YGR128C YDR449C YDR339C YDL208W YDL014W YPL093W YCL031C YPL169C YHR148W YNR053C YOR185C YAL033W YGR218W YML093W YJR002W YGR030C YOR061W YEL026W YNL075W YGL099W YLR129W YHR089C YPL043W YOR056C YLR409C YMR239C YLR059C YJL069C YLR186W YHR170W YLR175W YOR310C YNL132W YCR057C YGL173C YLR106C YHR062C YLR397C YDL166C YHR196W YOL01…
Fatty acid metabolism	17	20	0.0198341	YMR246W YER061C YDL015C YKL182W YGL055W YIL160C YBR026C YER015W YOR317W YCR034W YGL205W YLR372W YOR221C YBR159W YJL097W YNR016C YPL231W
Glyoxylate and dicarboxylate metabolism	18	22	0.02864	YFL030W YNL117W YLR058C YGR088W YPR035W YER065C YBR263W YDR428C YGR205W YPR001W YPR006C YDL078C YCR005C YAL044C YNR001C YIR031C YKL085W YDR256C
Peroxisome	25	34	0.0513357	YDR142C YOR317W YGL205W YNL202W YML042W YDR329C YAR035W YLR174W YFL030W YGR088W YNL009W YDR244W YLR251W YLR252W YLR191W YDR265W YDR256C YEL020C YKL188C YJR104C YER015W YMR246W YKL197C YMR026C YGL153W YPL147W
RNA transport	55	87	0.0843303	YLR293C YGL100W YKR026C YBR257W YBR167C YMR146C YGR083C YMR125W YPR041W YLR208W YPL169C YDR532C YOR185C YAL033W YGR218W YML103C YKR079C YJL138C YKR059W YIL149C YGL172W YGL049C YDL084W YGR030C YDR021W YJL039C YDR429C YNL253W YDR211W YER025W YMR309C YJR007W YDR381W YOR361C YER107C YER107W-A YMR235C YHR170W YAL035W YLR192C YBR079C YER165W YKL205W YJL041W YOL139C YMR080C YOR260W YJR042W YHR062C YBR11…
Nitrogen metabolism	6	6	0.145648	YPR035W YAL062W YDL215C YDL171C YOR375C YJR149W
beta-Alanine metabolism	10	12	0.145648	YOR374W YMR169C YPR069C YMR170C YMR020W YGR019W YPL061W YER073W YMR250W YLR146C
Biosynthesis of unsaturated fatty acids	8	9	0.145648	YDL015C YGL055W YLR372W YJL097W YCR034W YGL205W YJR019C YBR159W
Alanine, aspartate and glutamate metabolism	21	30	0.145648	YFL030W YNL220W YMR300C YOR303W YPR035W YAL062W YJL130C YKL104C YDR321W YHR018C YGR124W YLR089C YDL171C YPR145W YLR359W YDR111C YOR375C YGR019W YMR250W YDL215C YJR109C
Fatty acid degradation	13	17	0.145648	YMR246W YOR374W YIL160C YPL061W YER015W YOR317W YGL205W YOL086C YBR145W YGL256W YDL168W YER073W YMR303C
Glycolysis / Gluconeogenesis	35	55	0.146745	YMR278W YMR323W YKR043C YLR153C YKL060C YBR145W YGR087C YKL127W YMR169C YLR044C YLR377C YBR196C YGR240C YJR009C YAL038W YER073W YKL152C YOR374W YHR174W YAL054C YOR347C YMR170C YPL061W YGR192C YDR050C YMR303C YDL021W YMR205C YLR134W YJL052W YOL086C YKR097W YGL256W YDL168W YBR019C
Pentose phosphate pathway	19	28	0.186714	YKL127W YMR278W YHL011C YPR074C YGR256W YBR116C YBR117C YBL068W YLR377C YJL121C YKL060C YBR196C YGR240C YMR205C YKL181W YOR095C YOL061W YGR043C YCR073W-A YDR248C
Propanoate metabolism	9	12	0.306224	YOR374W YAL054C YGR244C YNR016C YLR153C YGR019W YPL061W YPR002W YER073W
Pyruvate metabolism	21	33	0.319054	YOR374W YAL038W YML054C YNL117W YNR016C YAL054C YOR347C YDL078C YLR153C YBL015W YDL174C YPL061W YKR097W YGL062W YIR031C YDR272W YOR040W YKL085W YER073W YKL029C YML004C
Biosynthesis of amino acids	67	121	0.391058	YAL038W YHR025W YMR323W YKR043C YJR130C YIL074C YKL060C YGL148W YMR205C YDL171C YGL184C YCR005C YER069W YKL152C YOL061W YJR148W YDR234W YJR016C YJL200C YER086W YJL071W YPR074C YPR035W YNL009W YBL068W YER023W YLR089C YPR060C YJR009C YBR263W YJR139C YHR208W YHR018C YHL011C YCL064C YIL168W YNR001C YEL046C YHR174W YMR062C YGL009C YOR347C YJL121C YGR043C YGR192C YMR108W YNR050C YDR050C YOR095C YCL030C…
Protein processing in endoplasmic reticulum	44	80	0.523577	YIL016W YPR181C YML013W YBR082C YDR057W YJL034W YDR086C YBL075C YOR085W YPL096W YPL240C YJL073W YGR048W YIL109C YLL024C YOL013C YLR208W YPL218W YGL022W YLR057W YOR254C YNL209W YAL005C YJR007W YDR171W YOL031C YCL043C YJL002C YMR214W YPL106C YIL030C YER103W YDL195W YGL027C YBR072W YLR378C YKL073W YER087C-B YBR283C YNL064C YMR276W YEL002C YMR186W YEL037C
a Number of differential expressed genes related to a certain KEGG pathway.
b Number of the total genes related to a certain KEGG pathway.
c Hypergeometric test was used for statistical analysis. P-values have been corrected for multiple testing by the Benjamini and. Hochberg adjustment method. A corrected P value of <0.05 was considered statistically significant.
